# Supplementary material for: LDL Receptor Pathway Regulation by miR-224 and miR-520d
Source: PubMed Central journal article supplement (PMC7256473; doi:10.3389/fcvm.2020.00081), 2020-05-22

**Supplementary Table 1.** Primers used to introduce point mutations in the MRE of the 3'UTR of PCSK9, IDOL and HMGCR

| Genes (human) | miRNA       | Point mutations                                                                                                                                                                                                                                                                                                                                                                                                                                                                                       |
|---------------|-------------|-------------------------------------------------------------------------------------------------------------------------------------------------------------------------------------------------------------------------------------------------------------------------------------------------------------------------------------------------------------------------------------------------------------------------------------------------------------------------------------------------------|
| PCSK9         | hsa-miR-224 | <p><u>MRE 1:</u><br/>           FW: 5'-GATGTCCGTGGGCAGAATTATTGAGCTCTGTTC-3'<br/>           RV: 5'-GAACAAGAGCTCAATAATTCTGCCACGGACATC-3'</p> <p><u>MRE 2:</u><br/>           FW: 5'-GCCGATGTCCGTGGGCAGAAAGTCAATTATTGAGCTCTGTTC-3'<br/>           RV: 5'-ACGGAACAAGAGCTCAATAATTGACTTTCTGCCACGGACATCGGC-3'</p>                                                                                                                                                                                            |
|               | hsa-miR-520 | <p><u>MRE 1:</u><br/>           FW: 5'-CTGTTTGCCTTGAAGATAATTATCTGGGTGCATTTTTATTAATATG-3'<br/>           RV: 5'-CATATTAATAAAAAATGCACCCAGAATAAATATCTTCAAGGCAAAACAGG-3'</p> <p><u>MRE 2:</u><br/>           FW: 5'-CTAGACCTGTTTGTCTAATCAATTGAAGAC<br/>           ATATTTATTCTGGGTAAAGATGCATTTTTATTAATATGGTGACTTTTTAAA-3'<br/>           RV: 5'-TTTAAAAAGTCACCATATTAATAAAAAATGC<br/>           ATCTTACCCAGAATAAATATCTTCAAGTTGATTAGCAAAACAGGTCTAG-3'</p>                                                    |
| IDOL          | hsa-miR-224 | <p><u>MRE:</u><br/>           FW: 5'-GGAAGGCAAACAGGTTTACAAATCAATTGTCAGACTTTTAAA-3'<br/>           RV: 5'-TTTAAAAGTCTGACAATTGATTTGTAAACCTGTTGCCTTCC-3'</p>                                                                                                                                                                                                                                                                                                                                             |
|               | hsa-miR-520 | <p><u>MRE 1:</u><br/>           FW: 5'-ACTGGCAGCAGATAATGTTTGAATTACTTTAAGAATTT<br/>           CATTCTTTTGTATGGTCATGGAGCTCCAACCATTTT-3'<br/>           RV: 5'-AAAATGGTTGGAGCTCCATGACCATACAAAAAGAATGA<br/>           AATTCTTAAAAGTAATTCAAACATTATCTGCTGCCAGT -3'</p> <p><u>MRE 2:</u><br/>           FW: 5'-GAGCTCCAACCATTTTAAATAGGAAAGTCTTAAGATAAT<br/>           TGTTGTCGTTTTAATGTCATTTCT-3'<br/>           RV: 5'-AGAAATGACATTAACGACAACAATTATCTTAAGACTT<br/>           TCCTATTA AAAATGGTTGGAGCTC-3'</p> |
| HMGCR         | hsa-miR-224 | <p><u>MRE 1/2:</u><br/>           FW: 5'-CGTAAAGCTTAAATTGCTTTTGTCTTCTGAGCTTTTCATGGAAGTGG-3'<br/>           RV: 5'-CCACTTCCATGAAAAGCTCAGAAAAACAAAAGCAATTTAAGCTTTACG-3'</p> <p><u>MRE 3:</u><br/>           FW: 5'- CCACTTCCATGAAAAGCTCAGAAAAACAAAAGCAATTTAAGCTTTACG -3'<br/>           RV: 5'- CCACTTCCATGAAAAGCTCAGAAAAACAAAAGCAATTTAAGCTTTACG -3'</p>                                                                                                                                                |
|               | hsa-miR-520 | <p><u>MRE 1:</u><br/>           FW: 5'-CTTAAAAGACATTTTTATTAGTTGAAAAATCTAGA-3'<br/>           RV: 5'-ACTGTATCAAATCTGTATATGTTGTAATAAAAAT-3'</p> <p><u>MRE 2:</u><br/>           FW: 5'-AGTTTTATTACAACATATACAGATTTGATACAGTTC-3'<br/>           RV: 5'-TAGATTTTCAACTAAAATAAAAATGTCTTTAAG -3'</p>                                                                                                                                                                                                          |

**Supplementary Table 2.** qRT-PCR primers used in this study

| <b>Genes (human)</b> | <b>Forward Sequence</b>    | <b>Reverse Sequence</b>        |
|----------------------|----------------------------|--------------------------------|
| <i>PCSK9</i>         | 5'-AGGGGAGGACATCATTGGTG-3' | 5'-CAGGTTGGGGGTCAGTACC-3'      |
| <i>IDOL</i>          | 5'-CGAGGACTGCCTCAACCA-3'   | 5'-TGCAGTCCAAAATAGTCAACTTCT-3' |
| <i>HMGCR</i>         | 5'-GTCATTCCAGCCAAGGTTGT-3' | 5'-GGGACCACTTGCTTCCATTA-3'     |
| <i>LDLR</i>          | 5'-CTCTCTGCGAAGTCTGGACG-3' | 5'-ACTAACCTGTCCGTACACCTTG-3'   |
| <i>GAPDH</i>         | 5'GAAGGTGAAGGTCGGAGTC-3'   | 5'-GAAGATGGTGATGGGATTTC-3'     |

| <b>Genes (mouse)</b> | <b>Forward Sequence</b>      | <b>Reverse Sequence</b>     |
|----------------------|------------------------------|-----------------------------|
| <i>Pcsk9</i>         | 5'-GAGACCCAGAGGCTACAGATT-3'  | 5'-AATGTACTCCACATGGGGCAA-3' |
| <i>Idol</i>          | 5'-AGGAGATCAACTCCACCTTCTG-3' | 5'-ATCTGCAGACCGGACAGG-3'    |
| <i>Hmgcr</i>         | 5'-TTGCAGAGCCGTCCTCTCTA-3'   | 5'-AGCAAGCTCCCATCACCAAG-3'  |
| <i>Ldlr</i>          | 5'-CATGGCAGCCGGCAGTGTGA-3'   | 5'-TTGGGTCCCTCGCAGAGTGT-3'  |
| <i>Gapdh</i>         | 5'TGTGAGGGAGATGCTCAGTG-3'    | 5'-TGTTCTACCCCAATGTGT-3'    |

| <u>Qiagen miScript Primer Assays</u> |                        |
|--------------------------------------|------------------------|
| hsa_miR-27b (MS00031668)             | sequence not disclosed |
| hsa_miR-128 (MS00045850)             | sequence not disclosed |
| hsa_miR-224 (MS00003878)             | sequence not disclosed |
| hsa_miR-520d (MS00033866)            | sequence not disclosed |
| RNU6 (MS00033740)                    | sequence not disclosed |

# Supplemental Figure 1

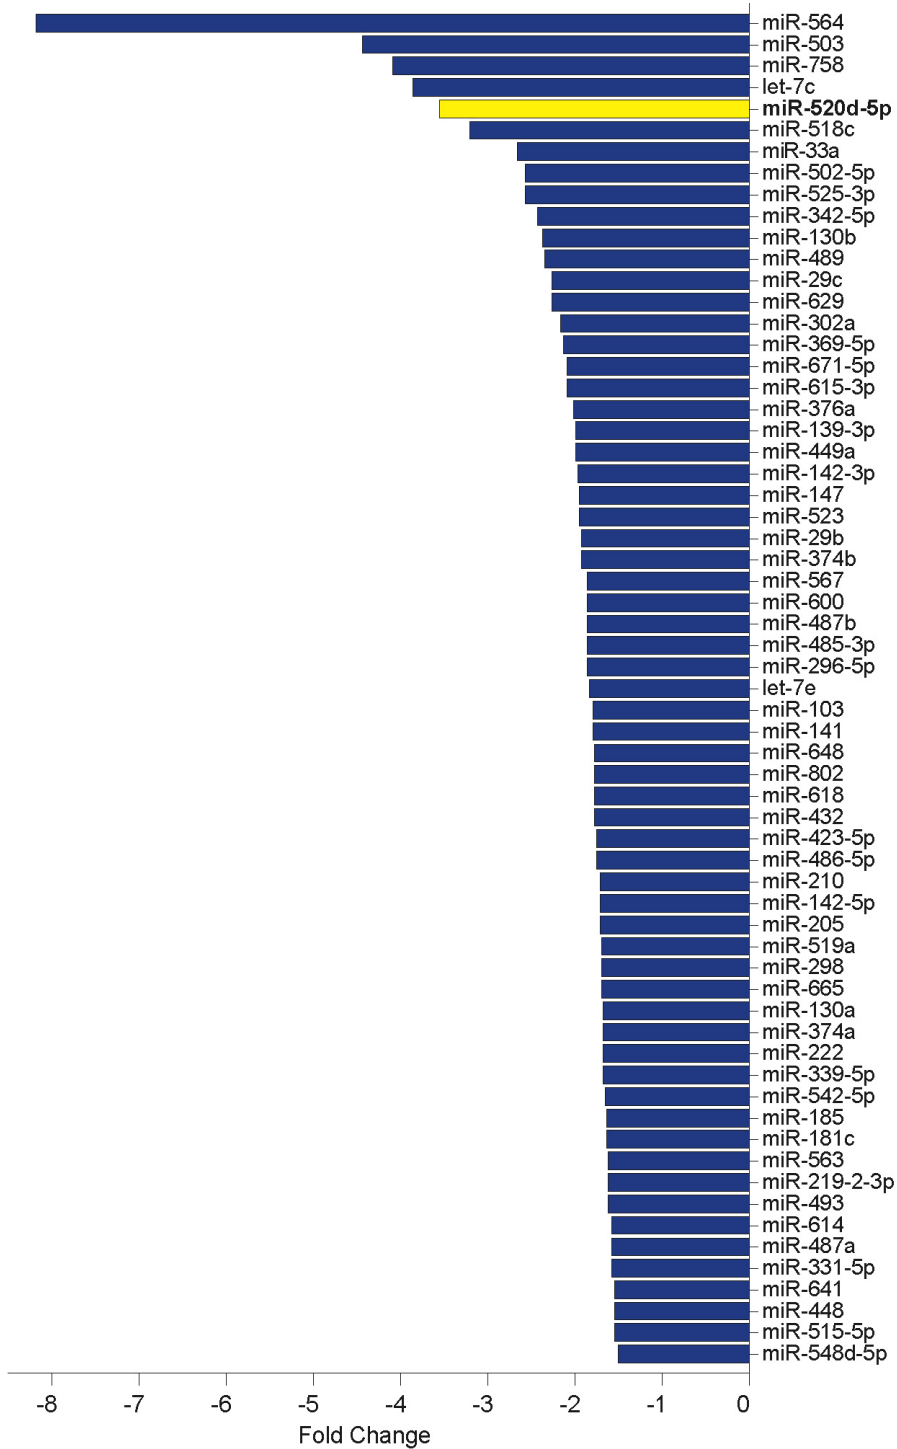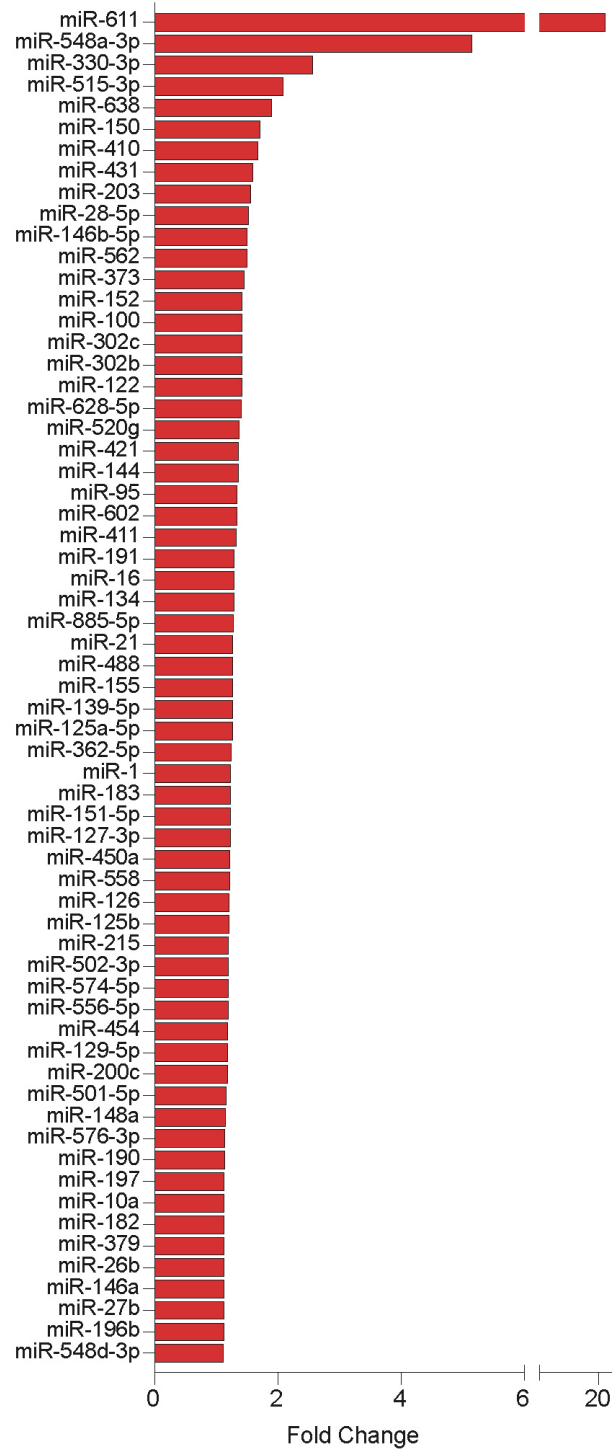

## Supplemental Figure 2

### PCSK9 3' UTR

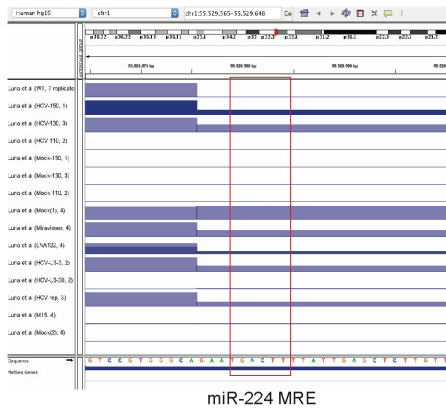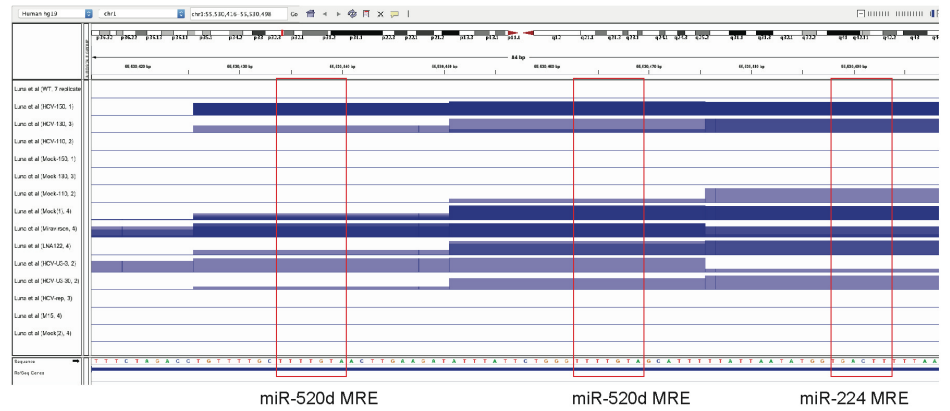



# Supplemental Figure 3

## IDOL 3' UTR

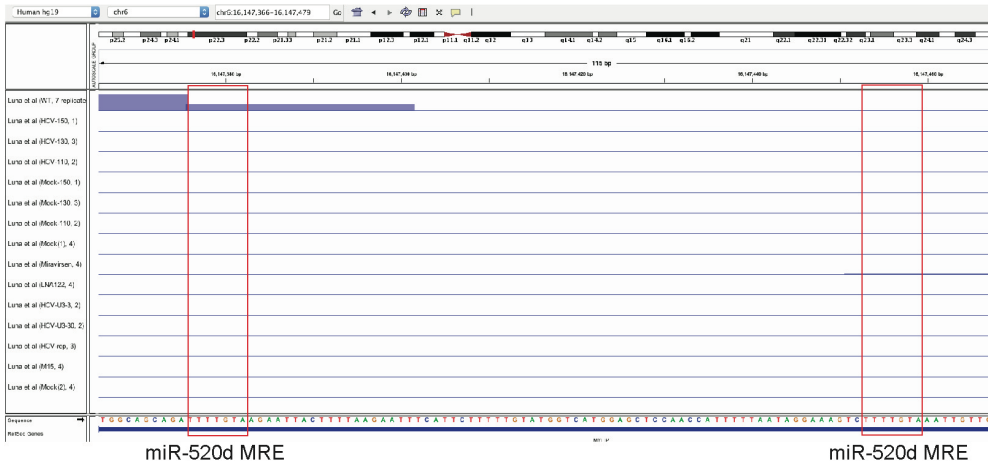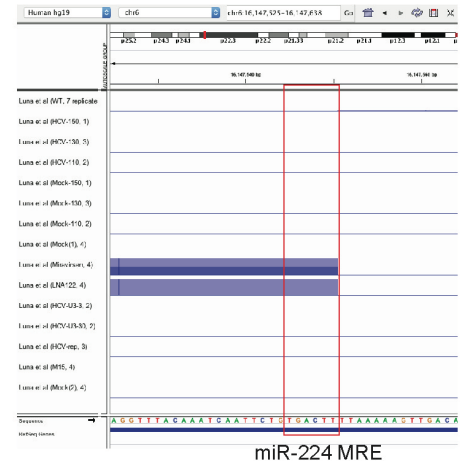



## Supplemental Figure 5

**A**

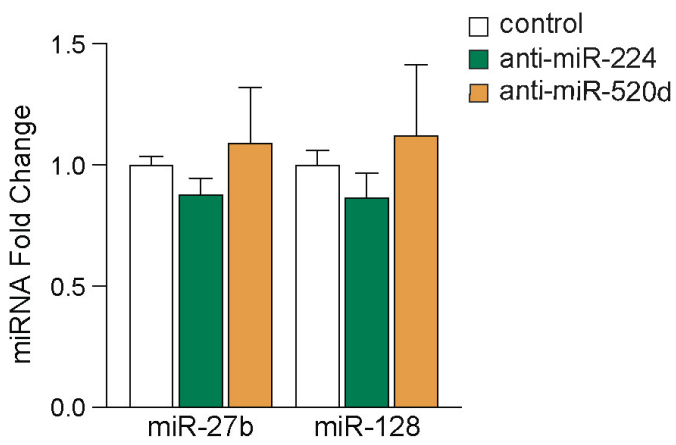

**B**

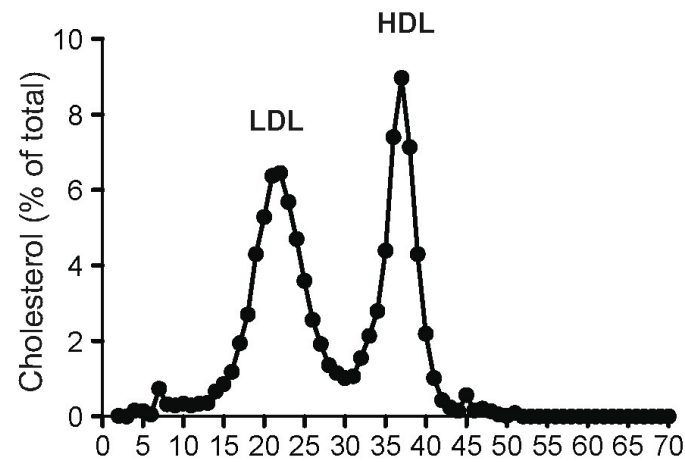

**C**

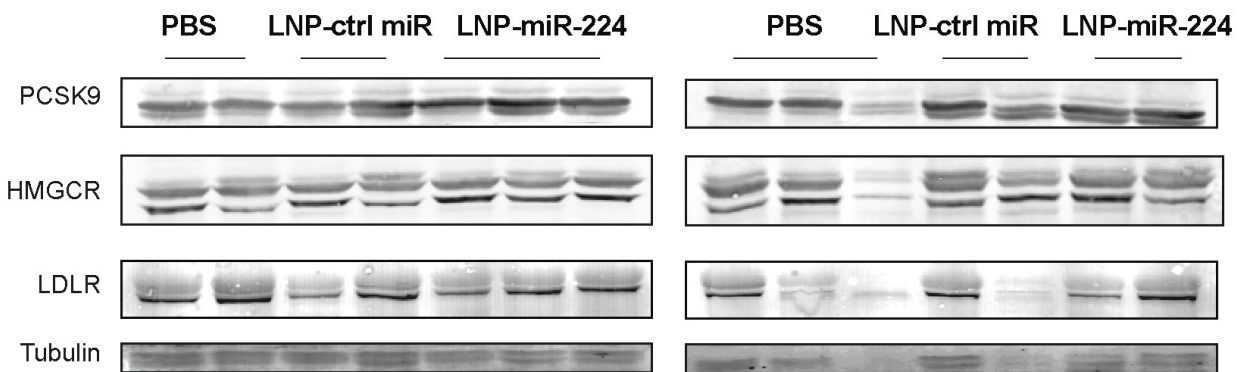

# Supplemental Figure 6

**A**

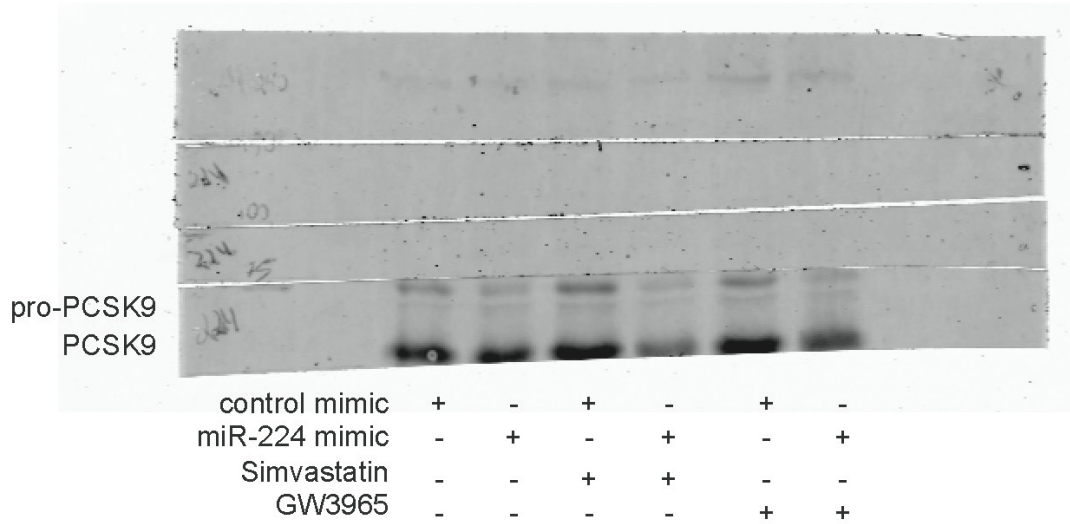

**B**

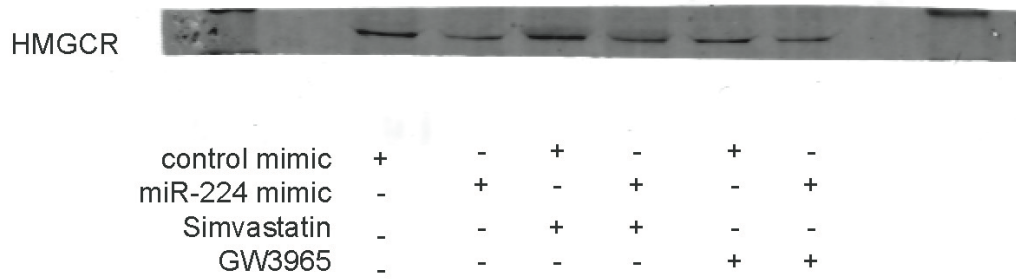

**C**

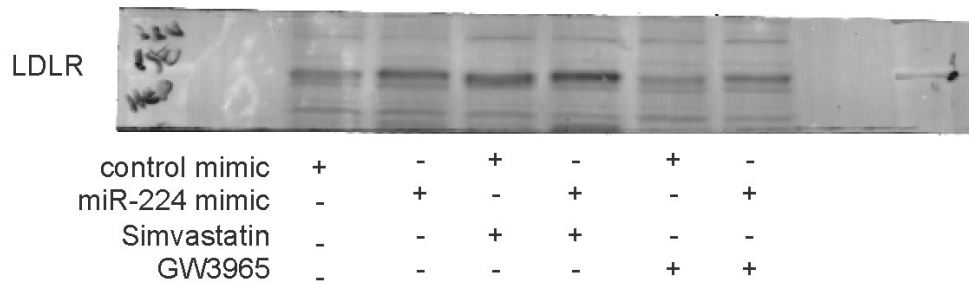

**D**

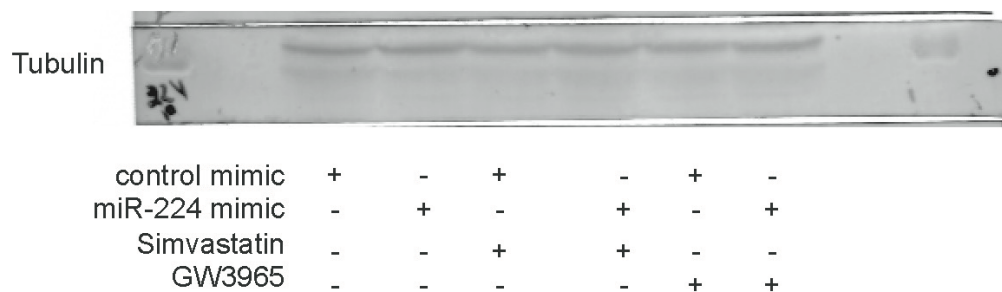

# Supplemental Figure 7

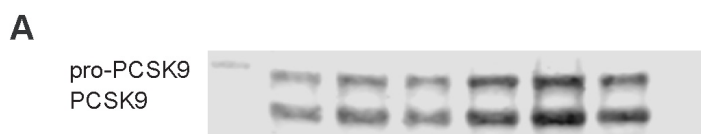

|                  |   |   |   |   |   |   |
|------------------|---|---|---|---|---|---|
| control anti-miR | + | - | - | + | - | - |
| anti-miR-224     | - | + | - | - | + | - |
| anti-miR-520d    | - | - | + | - | - | + |
| simvastatin      | - | - | - | + | + | + |

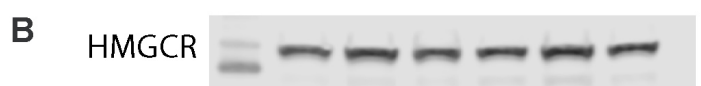

|                  |   |   |   |   |   |   |
|------------------|---|---|---|---|---|---|
| control anti-miR | + | - | - | + | - | - |
| anti-miR-224     | - | + | - | - | + | - |
| anti-miR-520d    | - | - | + | - | - | + |
| simvastatin      | - | - | - | + | + | + |

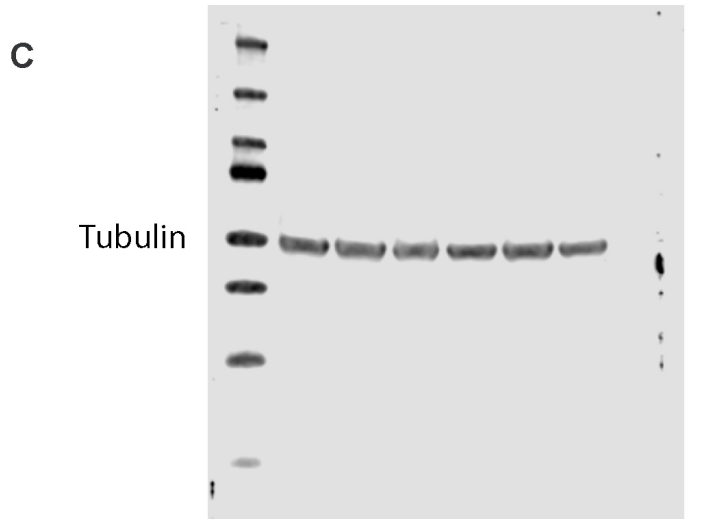

|                  |   |   |   |   |   |   |
|------------------|---|---|---|---|---|---|
| control anti-miR | + | - | - | + | - | - |
| anti-miR-224     | - | + | - | - | + | - |
| anti-miR-520d    | - | - | + | - | - | + |
| simvastatin      | - | - | - | + | + | + |

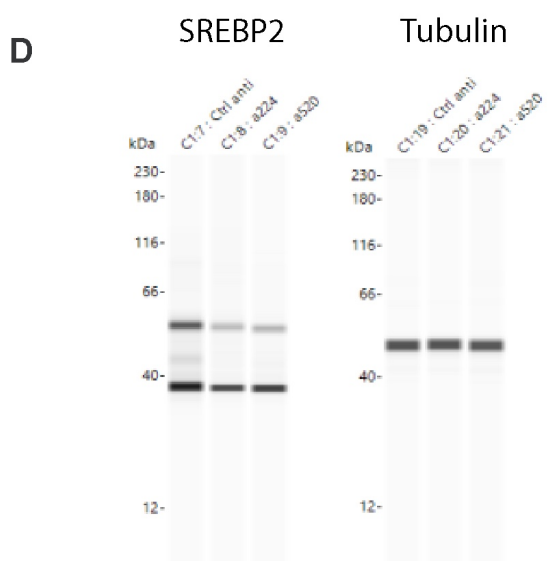

|                  |   |   |   |   |   |   |
|------------------|---|---|---|---|---|---|
| control anti-miR | + | - | - | + | - | - |
| anti-miR-224     | - | + | - | - | + | - |
| anti-miR-520d    | - | - | + | - | - | + |

# Supplemental Figure 8

**A**

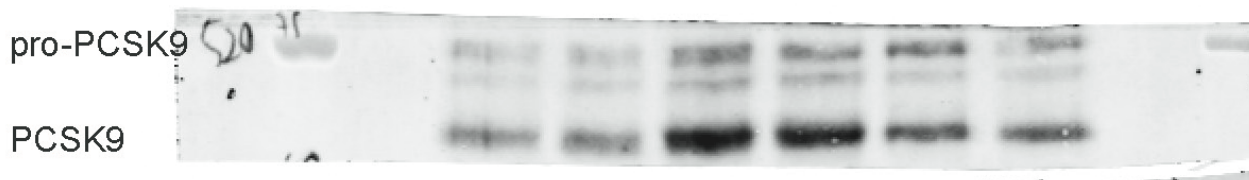

|                |   |   |   |   |   |   |
|----------------|---|---|---|---|---|---|
| control mimic  | + | - | + | - | + | - |
| miR-520d mimic | - | + | - | + | - | + |
| Simvastatin    | - | - | + | + | - | - |
| GW3965         | - | - | - | - | + | + |

**B**

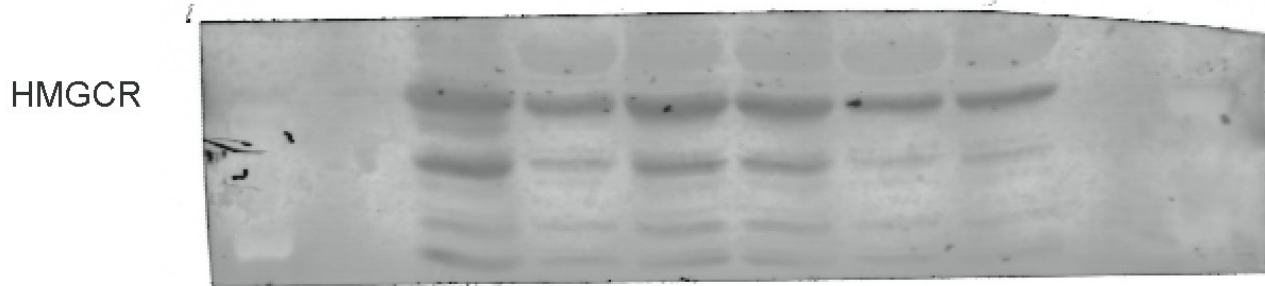

|                |   |   |   |   |   |   |
|----------------|---|---|---|---|---|---|
| control mimic  | + | - | + | - | + | - |
| miR-520d mimic | - | + | - | + | - | + |
| Simvastatin    | - | - | + | + | - | - |
| GW3965         | - | - | - | - | + | + |

**C**

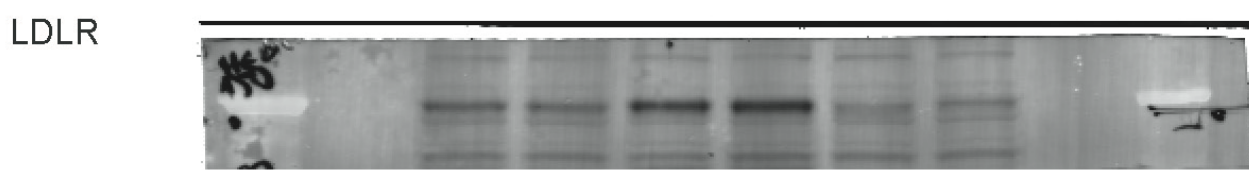

|                |   |   |   |   |   |   |
|----------------|---|---|---|---|---|---|
| control mimic  | + | - | + | - | + | - |
| miR-520d mimic | - | + | - | + | - | + |
| Simvastatin    | - | - | + | + | - | - |
| GW3965         | - | - | - | - | + | + |

**D**

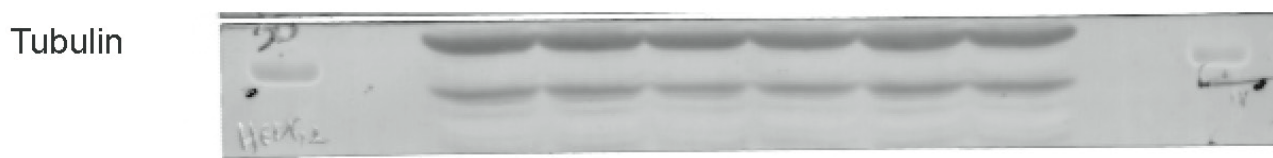

|                |   |   |   |   |   |   |
|----------------|---|---|---|---|---|---|
| control mimic  | + | - | + | - | + | - |
| miR-520d mimic | - | + | - | + | - | + |
| Simvastatin    | - | - | + | + | - | - |
| GW3965         | - | - | - | - | + | + |

## Supplemental Figure 9

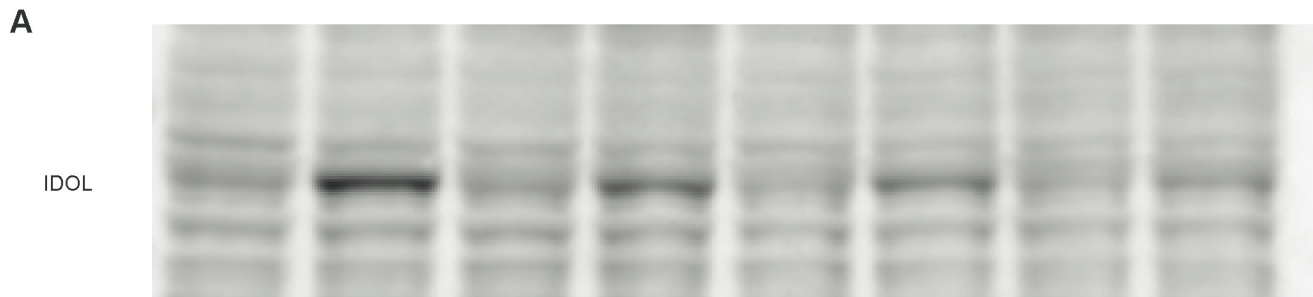

|                |   |   |   |   |   |   |   |   |
|----------------|---|---|---|---|---|---|---|---|
| control mimic  | + | + | - | - | - | - | - | - |
| miR-224 mimic  | - | - | + | + | - | - | - | - |
| miR-520d mimic | - | - | - | - | + | + | - | - |
| siRNA IDOL     | - | - | - | - | - | - | + | + |
| GW3965         | - | + | - | + | - | + | - | + |

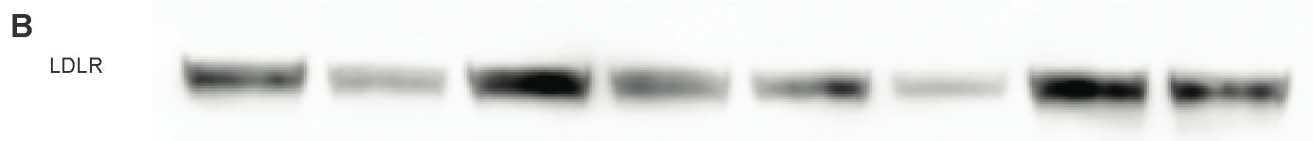

|                |   |   |   |   |   |   |   |   |
|----------------|---|---|---|---|---|---|---|---|
| control mimic  | + | + | - | - | - | - | - | - |
| miR-224 mimic  | - | - | + | + | - | - | - | - |
| miR-520d mimic | - | - | - | - | + | + | - | - |
| siRNA IDOL     | - | - | - | - | - | - | + | + |
| GW3965         | - | + | - | + | - | + | - | + |

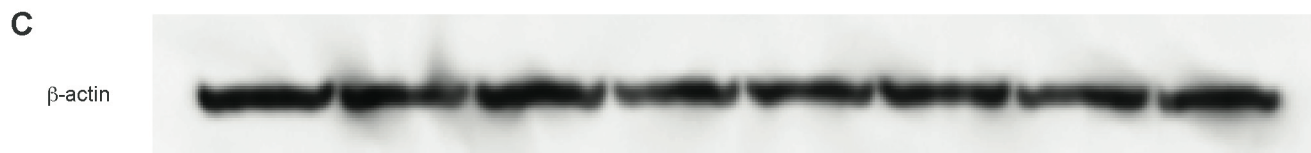

|                |   |   |   |   |   |   |   |   |
|----------------|---|---|---|---|---|---|---|---|
| control mimic  | + | + | - | - | - | - | - | - |
| miR-224 mimic  | - | - | + | + | - | - | - | - |
| miR-520d mimic | - | - | - | - | + | + | + | - |
| siRNA IDOL     | - | - | - | - | - | - | - | + |
| GW3965         | - | + | - | + | - | + | - | + |

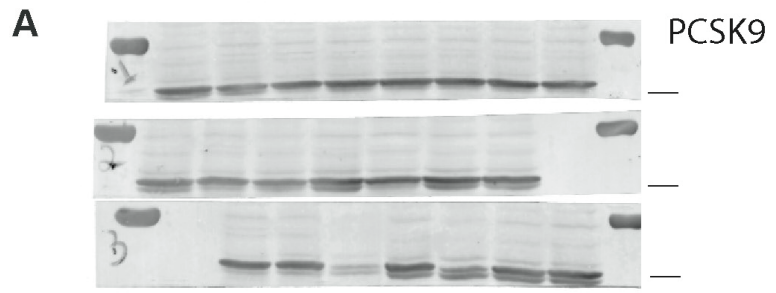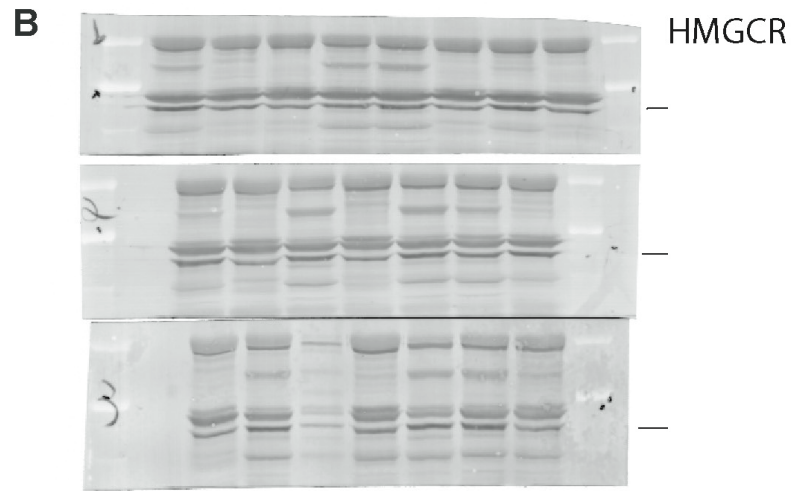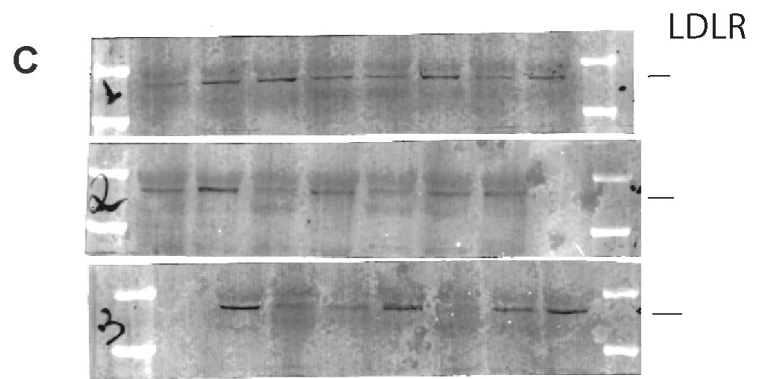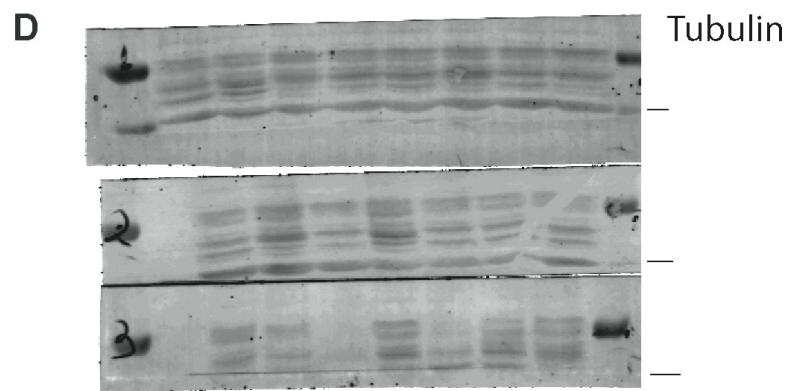

Supplement: Data_Sheet_1.pdf [file Data_Sheet_1.pdf]
